# Supplementary material for: Web-based and mixed-mode cognitive large-scale assessments in higher education: An evaluation of selection bias, measurement bias, and prediction bias
Source: Springer Nature journal article supplement (doi:10.3758/s13428-020-01480-7), 2020-10-01
Supplement: MOESM1 [file 13428_2020_1480_MOESM1_ESM.pdf]

Zinn, Sabine; Landrock, Uta; Gnamb, Timo

**Article — Published Version**

Web-based and mixed-mode cognitive large-scale assessments in higher education: An evaluation of selection bias, measurement bias, and prediction bias

Behavior Research Methods

**Provided in Cooperation with:**

German Institute for Economic Research (DIW Berlin)

*Suggested Citation:* Zinn, Sabine; Landrock, Uta; Gnamb, Timo (2021) : Web-based and mixed-mode cognitive large-scale assessments in higher education: An evaluation of selection bias, measurement bias, and prediction bias, Behavior Research Methods, ISSN 1554-351X, Springer, Berlin, Heidelberg, Vol. 53, Iss. 3, pp. 1202-1217, <https://doi.org/10.3758/s13428-020-01480-7> , <https://link.springer.com/article/10.3758%2Fs13428-020-01480-7#article-info>

This Version is available at:

<https://hdl.handle.net/10419/236200>

**Standard-Nutzungsbedingungen:**

Die Dokumente auf EconStor dürfen zu eigenen wissenschaftlichen Zwecken und zum Privatgebrauch gespeichert und kopiert werden.

Sie dürfen die Dokumente nicht für öffentliche oder kommerzielle Zwecke vervielfältigen, öffentlich ausstellen, öffentlich zugänglich machen, vertreiben oder anderweitig nutzen.

Sofern die Verfasser die Dokumente unter Open-Content-Lizenzen (insbesondere CC-Lizenzen) zur Verfügung gestellt haben sollten, gelten abweichend von diesen Nutzungsbedingungen die in der dort genannten Lizenz gewährten Nutzungsrechte.

**Terms of use:**

*Documents in EconStor may be saved and copied for your personal and scholarly purposes.*

*You are not to copy documents for public or commercial purposes, to exhibit the documents publicly, to make them publicly available on the internet, or to distribute or otherwise use the documents in public.*

*If the documents have been made available under an Open Content Licence (especially Creative Commons Licences), you may exercise further usage rights as specified in the indicated licence.*

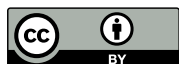

<http://creativecommons.org/licenses/by/4.0/deed.de>

Supplement Material for

Web-Based and Mixed-Mode Cognitive Large-Scale Assessments:

An Evaluation of Selection Bias, Measurement Bias, and Prediction Bias

- Predictors of nonresponse
- Table S1. Summary statistics of predictors of self-selection and nonresponse by mode.
- Table S2. Logit regression for self-selection by assessment mode
- Table S3. Logit regressions for nonresponse analyses for students participating in the mode-specific assessments.

### Predictors of Nonresponse

We acknowledged 28 variables as potential predictors of nonresponse (see Table S1). As sociodemographic variables we considered students' year of birth (0 = "before 1989", 1 = "in 1989 or 1990", 2 = "after 1990"), gender (0 = "male", 1 = "female"), country of birth (0 = "not Germany", 1 = "Germany"), mother tongue (0 = "non-German", 1 = "German"), whether children lived in the household (0 = "no", 1 = "yes"), the number of years in education of their mothers and fathers, and their household size at the time of the testing (0 = "one person", 1 = "two persons", 2 = "three or more persons"). These or similar variables have been previously found to explain wave-specific participation propensities in the NEPS (Zinn, Steinhauer, & Aßmann 2017). Therefore, we considered them suitable candidates for mode-specific nonresponse predictors. The same applies to the following study-specific variables: does a student has a traditional university admission certificate<sup>1</sup> (0 = "no, a non-traditional German one", 1 = "yes, a traditional German one", 2 = "yes, a non-German one"), is the student's study field teacher education (0 = "no", 1 = "yes"), or natural sciences (0 = "no", 1 = "yes"), where does he /she study (0 = "Western Germany", 1 = "Eastern Germany"), is the student's university a public or private one (0 = "private", 1 = "public"), and is the university one of applied sciences or a general one or of some other kind (1 = "general university", 1 = "university of applied sciences", 2 = "of some other kind"). Besides, we took into account factors for academic success. We considered students' competence scores in mathematics obtained in the first wave of the NEPS (see Gerken & Schnittjer, 2017), their subjective probability of successful graduation in that year (on a scale from 1 to 5 with 1 = "very unlikely" and 5 = "very likely"), and whether they enjoyed studying (on a scale from 1 to 5 with 1 = "does not apply at all" and 5 = "is absolutely true"). Furthermore, our nonresponse model contained students' average grades in their study programs after their first year, i.e.

---

<sup>1</sup> The German notions for the traditional university admission certificates are *Abitur* or *Fachabitur*.

after their 2<sup>nd</sup> semester. In addition, we included in our nonresponse models measures of the students' Big Five personality traits, that is, extraversion, agreeableness, conscientiousness, neuroticism, and openness (Rammstedt & John, 2007) and their self-esteem (Rosenberg, 1965). To map the general willingness of the students to participate in surveys we used information concerning their participation in previous NEPS waves. We used as predictors dummy variables indicating their participation in the paper-based competence tests at wave 1 in 2011 (0 = "no", 1 = "yes"), in the web-based interviews at the waves 2 and 4 in 2011 and 2012 (0 = "no", 1 = "yes"), and in the telephone interview at wave 3 in 2012 (0 = "no", 1 = "yes").

#### References

- Gerken, A.-L., & Schnittjer, I. (2017): *NEPS Technical Report for Mathematics: Scaling Results of Starting Cohort 5 for First-Year Students* (NEPS Survey Paper No. 17). Bamberg, Germany: Leibniz Institute for Educational Trajectories, National Educational Panel Study.
- Rammstedt, B., & John, O. P. (2007). Measuring personality in one minute or less: a 10-item short version of the Big Five Inventory in English and German. *Journal of Research in Personality*, 41, 203-212. <https://doi.org/10.1016/j.jrp.2006.02.001>
- Rosenberg, M. (1965). *Society and the Adolescent Self-Image*. Princeton, NJ: Princeton University Press.
- Zinn, S., Steinhauer, H. W., & Aßmann, C. (2017). *Samples, weights, and nonresponse: the student sample of the National Educational Panel Study (Wave 1 to 8)* (NEPS Survey Paper No. 18). Bamberg, Germany: Leibniz Institute for Educational Trajectories, National Educational Panel Study.

Table S1.

*Summary Statistics of Predictors of Self-Selection and Nonresponse by Mode.*

| Variable                |                              | Reference category | PBA      |           |           | CBA      |           |           | WBA      |           |           | WBA-switch |           |           |
|-------------------------|------------------------------|--------------------|----------|-----------|-----------|----------|-----------|-----------|----------|-----------|-----------|------------|-----------|-----------|
|                         |                              |                    | <i>M</i> | <i>SD</i> | <i>MI</i> | <i>M</i> | <i>SD</i> | <i>MI</i> | <i>M</i> | <i>SD</i> | <i>MI</i> | <i>M</i>   | <i>SD</i> | <i>MI</i> |
| Socio-demographics      | Gender                       | male               | 0.42     | --        | 0.00      | 0.33     | --        | 0.00      | 0.41     | --        | 0.00      | 0.40       | --        | 0.00      |
|                         |                              | female             | 0.58     | --        | 0.00      | 0.67     | --        | 0.00      | 0.59     | --        | 0.00      | 0.60       | --        | 0.00      |
|                         | Country of birth             | not Germ.          | 0.06     | --        | 0.00      | 0.05     | --        | 0.00      | 0.07     | --        | 0.00      | 0.06       | --        | 0.00      |
|                         |                              | Germany            | 0.94     | --        | 0.00      | 0.95     | --        | 0.00      | 0.93     | --        | 0.00      | 0.94       | --        | 0.00      |
|                         | Mother tongue                | non-Germ.          | 0.08     | --        | 0.00      | 0.06     | --        | 0.00      | 0.09     | --        | 0.01      | 0.08       | --        | 0.01      |
|                         |                              | German             | 0.92     | --        | 0.00      | 0.94     | --        | 0.00      | 0.91     | --        | 0.01      | 0.92       | --        | 0.01      |
|                         | Children                     | no                 | 0.97     | --        | 48.09     | 0.98     | --        | 46.16     | 0.94     | --        | 47.01     | 0.96       | --        | 49.10     |
|                         |                              | yes                | 0.03     | --        | 48.09     | 0.02     | --        | 46.16     | 0.06     | --        | 47.01     | 0.04       | --        | 49.10     |
|                         | Household size               | one person         | 0.46     | --        | 26.75     | 0.44     | --        | 24.25     | 0.48     | --        | 29.11     | 0.48       | --        | 31.36     |
|                         |                              | two persons        | 0.20     | --        | 26.75     | 0.19     | --        | 24.25     | 0.20     | --        | 29.11     | 0.18       | --        | 31.36     |
|                         |                              | three + persons    | 0.34     | --        | 26.75     | 0.37     | --        | 24.25     | 0.32     | --        | 29.11     | 0.34       | --        | 31.36     |
|                         | Birth year                   | before 1989        | 0.23     | --        | 0.00      | 0.21     | --        | 0.00      | 0.28     | --        | 0.00      | 0.23       | --        | 0.00      |
|                         |                              | 1989/1990          | 0.52     | --        | 0.00      | 0.53     | --        | 0.00      | 0.48     | --        | 0.00      | 0.52       | --        | 0.00      |
|                         |                              | after 1990         | 0.25     | --        | 0.00      | 0.26     | --        | 0.00      | 0.24     | --        | 0.00      | 0.25       | --        | 0.00      |
|                         | Years in education of mother |                    | 14.12    | 2.37      | 2.42      | 14.23    | 2.43      | 1.60      | 14.13    | 2.42      | 2.68      | 14.11      | 2.40      | 2.41      |
|                         | Years in education of father |                    | 14.61    | 2.37      | 3.78      | 14.77    | 2.55      | 2.54      | 14.50    | 2.55      | 3.74      | 14.63      | 2.54      | 3.73      |
| Personality             | Extraversion                 |                    | 3.72     | 0.83      | 26.33     | 3.77     | 0.81      | 23.78     | 3.71     | 0.85      | 25.42     | 3.74       | 0.82      | 29.42     |
|                         | Agreeableness                |                    | 3.57     | 0.55      | 26.29     | 3.66     | 0.55      | 23.72     | 3.58     | 0.56      | 25.39     | 3.60       | 0.55      | 29.38     |
|                         | Conscientiousness            |                    | 3.77     | 0.76      | 26.25     | 3.83     | 0.75      | 23.72     | 3.78     | 0.76      | 25.38     | 3.77       | 0.76      | 29.37     |
|                         | Neuroticism                  |                    | 2.71     | 0.82      | 26.27     | 2.71     | 0.80      | 23.72     | 2.70     | 0.80      | 25.37     | 2.70       | 0.82      | 29.38     |
|                         | Openness                     |                    | 3.59     | 0.90      | 26.25     | 3.66     | 0.90      | 23.72     | 3.60     | 0.91      | 25.38     | 3.62       | 0.90      | 26.37     |
|                         | Self-esteem                  |                    | 42.06    | 4.65      | 26.64     | 42.37    | 4.59      | 24.22     | 42.17    | 4.58      | 25.91     | 42.12      | 4.65      | 29.85     |
| Student characteristics | Region of Germany            | West.              | 0.76     | --        | 0.04      | 0.95     | --        | 0.03      | 0.74     | --        | 0.01      | 0.84       | --        | 0.04      |
|                         |                              | East               | 0.24     | --        | 0.04      | 0.05     | --        | 0.00      | 0.26     | --        | 0.01      | 0.16       | --        | 0.04      |
|                         | Study of natural sciences    | no                 | 0.78     | --        | 0.34      | 0.77     | --        | 0.38      | 0.78     | --        | 0.33      | 0.78       | --        | 0.35      |
|                         |                              | yes                | 0.22     | --        | 0.34      | 0.23     | --        | 0.38      | 0.22     | --        | 0.33      | 0.22       | --        | 0.35      |
|                         | Study of teacher education   | no                 | 0.71     | --        | 0.24      | 0.56     | --        | 0.23      | 0.69     | --        | 0.24      | 0.68       | --        | 0.25      |
|                         |                              | Yes                | 0.29     | --        | 0.24      | 0.44     | --        | 0.23      | 0.31     | --        | 0.24      | 0.32       | --        | 0.25      |

| Variable                        |                                           | Reference category | PBA   |      | CBA   |      | WBA   |       | WBA-switch |      |       |       |      |       |
|---------------------------------|-------------------------------------------|--------------------|-------|------|-------|------|-------|-------|------------|------|-------|-------|------|-------|
|                                 | Public university                         | no                 | 0.02  | --   | 0.00  | 0.00 | --    | 0.00  | 0.04       | --   | 0.01  | 0.01  | --   | 0.00  |
|                                 | Yes                                       |                    | 0.98  | --   | 0.00  | 1.00 | --    | 0.00  | 0.96       | --   | 0.01  | 0.99  | --   | 0.00  |
|                                 | Institution type                          | general            | 0.73  | --   | 0.00  | 0.76 | --    | 0.00  | 0.71       | --   | 0.10  | 0.71  | --   | 0.00  |
|                                 | Applied sciences                          |                    | 0.24  | --   | 0.00  | 0.24 | --    | 0.00  | 0.23       | --   | 0.10  | 0.27  | --   | 0.00  |
|                                 | other                                     |                    | 0.03  | --   | 0.00  | 0.00 | --    | 0.00  | 0.06       | --   | 0.10  | 0.02  | --   | 0.00  |
|                                 | University admission certificate          | non-traditional    | 0.29  | --   | 26.72 | 0.25 | --    | 24.13 | 0.32       | --   | 29.04 | 0.33  | --   | 31.29 |
|                                 | traditional                               |                    | 0.70  | --   | 26.72 | 0.74 | --    | 24.13 | 0.67       | --   | 29.04 | 0.66  | --   | 31.29 |
|                                 | non-German                                |                    | 0.01  | --   | 26.72 | 0.01 | --    | 24.13 | 0.01       | --   | 29.04 | 0.01  | --   | 31.29 |
|                                 | Average grade in 2 <sup>nd</sup> semester |                    | 2.30  | 0.59 | 49.25 | 2.21 | 0.59  | 49.61 | 2.26       | 0.62 | 53.21 | 2.29  | 0.59 | 53.16 |
|                                 | Mathematical competence                   |                    | -0.05 | 1.23 | 63.97 | 0.13 | 1.21  | 62.43 | -0.04      | 1.22 | 69.25 | -0.04 | 1.20 | 71.46 |
|                                 | Enjoy studying                            |                    | 4.32  | 0.79 | 0.15  | 4.30 | --    | 0.26  | 4.27       | 0.83 | 0.46  | 4.29  | 0.82 | 0.22  |
|                                 | Probability of graduation                 |                    | 4.36  | 0.66 | 0.20  | 4.44 | --    | 0.29  | 4.36       | 0.67 | 0.48  | 4.38  | 0.65 | 0.28  |
| Participation in previous waves | PBA W1 <sup>(a)</sup>                     | no                 | 0.64  | --   | 0.00  | 0.72 | --    | 0.00  | 0.69       | --   | 0.00  | 0.71  | --   | 0.00  |
|                                 | yes                                       |                    | 0.36  | --   | 0.00  | 0.38 | --    | 0.00  | 0.31       | --   | 0.00  | 0.29  | --   | 0.00  |
|                                 | CAWI W2 <sup>(b)</sup>                    | no                 | 0.31  | --   | 0.00  | 0.39 | --    | 0.00  | 0.31       | --   | 0.00  | 0.35  | --   | 0.00  |
|                                 | yes                                       |                    | 0.69  | --   | 0.00  | 0.71 | --    | 0.00  | 0.69       | --   | 0.00  | 0.65  | --   | 0.00  |
|                                 | CATI W3 <sup>(c)</sup>                    | no                 | 0.26  | --   | 0.00  | 0.34 | --    | 0.00  | 0.25       | --   | 0.00  | 0.29  | --   | 0.00  |
|                                 | yes                                       |                    | 0.74  | --   | 0.00  | 0.76 | --    | 0.00  | 0.75       | --   | 0.00  | 0.71  | --   | 0.00  |
|                                 | CAWI W4 <sup>(d)</sup>                    | no                 | 0.37  | --   | 0.00  | 0.34 | --    | 0.00  | 0.37       | --   | 0.00  | 0.41  | --   | 0.00  |
|                                 | yes                                       |                    | 0.63  | --   | 0.00  | 0.66 | --    | 0.00  | 0.63       | --   | 0.00  | 0.59  | --   | 0.00  |
| Sample size                     |                                           |                    | 5,371 |      | 3,431 |      | 8,671 |       | 6,804      |      |       |       |      |       |

*Note.* PBA = standardized and supervised paper-based assessment, CBA = standardized and supervised computer-based assessment, WBA = unstandardized and unsupervised web-based assessment with random assignment, WBA-switch = unstandardized and unsupervised web-based assessment with non-random assignment (for PBA / CBA nonresponders), *M* = mean for continuous variables and the proportion for categorical variables, *SD* = standard deviation for continuous variables, *MI* = percentage of missing values. (a) PBA W1: paper-based assessment in wave 1. (b) CAWI W2: web-based interview in wave 2. (c) CATI W3: telephone interview in wave 3. (d) CAWI W4: web-based interview in wave 4.

Table S2.

*Logit Regression for Self-Selection by Assessment Mode*

| Predictor                                                      | Coding                       | Mode             | B      | 95% CI         |               |
|----------------------------------------------------------------|------------------------------|------------------|--------|----------------|---------------|
| <i>Main effects for assessment mode</i>                        |                              |                  |        |                |               |
| <i>(dummy-coded with WBA as reference category)</i>            |                              |                  |        |                |               |
|                                                                |                              | PBA              | -3.10* | (-5.16, -1.04) |               |
|                                                                |                              | CBA              | -0.97  | (-3.45, 1.51)  |               |
| <i>Interactions for selection variable and assessment mode</i> |                              |                  |        |                |               |
| Sociodemographics                                              | Gender                       | 0 = male         | PBA    | -0.17          | (-0.54, 0.20) |
|                                                                |                              | 1 = female       | CBA    | -0.17          | (-0.53, 0.18) |
|                                                                | Country of birth             | 0 = other        | PBA    | -0.16          | (-0.67, 0.36) |
|                                                                |                              | 1 = Germany      | CBA    | -0.18          | (-0.89, 0.54) |
|                                                                | Mother tongue                | 0 = other        | PBA    | 0.02           | (-0.42, 0.45) |
|                                                                |                              | 1 = German       | CBA    | 0.06           | (-0.56, 0.68) |
|                                                                | Children in household        | 0 = no           | PBA    | -0.29          | (-0.94, 0.36) |
|                                                                |                              | 1 = yes          | CBA    | -0.38          | (-1.36, 0.61) |
|                                                                | Household size               | 0 = 1 person     | PBA    | -0.47          | (-1.08, 0.15) |
|                                                                |                              | 1 = 2 persons    | CBA    | -0.47          | (-1.27, 0.33) |
|                                                                | Year of birth                | 0 = 1 person     | PBA    | -0.36          | (-0.97, 0.24) |
|                                                                |                              | 1 = 3+ persons   | CBA    | -0.23          | (-1.02, 0.56) |
|                                                                | Year of birth                | 0 = before 1989  | PBA    | -0.16          | (-0.38, 0.05) |
|                                                                |                              | 1 = 1989 or 1990 | CBA    | 0.04           | (-0.22, 0.30) |
|                                                                | Years of education of mother | 0 = before 1989  | PBA    | 0.08           | (-0.19, 0.34) |
|                                                                |                              | 1 = after 1990   | CBA    | -0.19          | (-0.48, 0.11) |
| Years of education of father                                   |                              | PBA              | 0.02   | (-0.02, 0.06)  |               |
|                                                                |                              | CBA              | 0.04   | (-0.01, 0.09)  |               |
| Personality                                                    | Extraversion                 |                  | PBA    | 0.04           | (-0.15, 0.23) |
|                                                                |                              |                  | CBA    | 0.09           | (-0.09, 0.27) |
|                                                                | Agreeableness                |                  | PBA    | 0.02           | (-0.14, 0.19) |
|                                                                |                              |                  | CBA    | 0.03           | (-0.17, 0.24) |
|                                                                | Conscientiousness            |                  | PBA    | 0.15           | (-0.01, 0.31) |
|                                                                |                              |                  | CBA    | -0.01          | (-0.18, 0.16) |
|                                                                | Neuroticism                  |                  | PBA    | 0.08           | (-0.07, 0.24) |
|                                                                |                              |                  | CBA    | 0.07           | (-0.11, 0.24) |
|                                                                | Openness                     |                  | PBA    | 0.06           | (-0.06, 0.18) |
|                                                                |                              |                  | CBA    | -0.04          | (-0.17, 0.09) |
| Self-esteem                                                    |                              | PBA              | 0.00   | (-0.03, 0.03)  |               |
|                                                                |                              | CBA              | -0.01  | (-0.04, 0.03)  |               |
| Student                                                        | Region of Germany            | 0 = West         | PBA    | 0.06           | (-0.16, 0.29) |
|                                                                |                              | 1 = East         |        |                |               |
|                                                                | Field of study               |                  | CBA    | 0.11           | (-0.39, 0.62) |
|                                                                |                              | 0 = other        | PBA    | -0.23          | (-0.54, 0.08) |
|                                                                | University type              | 1 = Sciences     | CBA    | -0.06          | (-0.42, 0.31) |
|                                                                |                              | 0 = other        | PBA    | 0.24           | (-0.03, 0.50) |
|                                                                | 1 = Teaching                 | CBA              | -0.06  | (-0.36, 0.24)  |               |
|                                                                |                              | PBA              | 0.01   | (-0.30, 0.31)  |               |

|                                              |                                                                  |     |           |                |
|----------------------------------------------|------------------------------------------------------------------|-----|-----------|----------------|
|                                              | 0 = General<br>1 = Applied<br>sciences                           | CBA | -0.79*    | (-1.19, -0.39) |
|                                              | 0 = General<br>1 = other                                         | PBA | 0.13      | (-0.61, 0.86)  |
|                                              | 0 = non-<br>traditional<br>(German)                              | CBA | 0.06      | (-2.45, 2.26)  |
| University<br>admissioncertificate           | 0 = non-<br>traditional<br>(German)<br>1 = traditional<br>German | PBA | 1.00*     | (0.24, 1.72)   |
|                                              | 0 = non-<br>traditional<br>(German)                              | CBA | -0.10     | (-1.14, 0.93)  |
|                                              | 1 = non-<br>German                                               | PBA | 0.87      | (-0.21, 1.96)  |
|                                              |                                                                  | CBA | 0.06      | (-1.51, 1.62)  |
| Average grade in<br>2 <sup>nd</sup> semester |                                                                  | PBA | -0.11     | (-0.33, 0.12)  |
|                                              |                                                                  | CBA | -0.17     | (-0.33, 0.12)  |
| Mathematical<br>competence                   |                                                                  | PBA | -0.05     | (-0.57, 0.46)  |
|                                              |                                                                  | CBA | -0.04     | (-0.49, 0.41)  |
| Enjoy studying                               |                                                                  | PBA | 0.04      | (-0.07, 0.15)  |
|                                              |                                                                  | CBA | -0.04     | (-0.19, 0.10)  |
| Subjective<br>probability<br>of graduation   |                                                                  | PBA | -0.11     | (-0.26, 0.04)  |
|                                              |                                                                  | CBA | 0.01      | (-0.19, 0.20)  |
| Sample Size                                  |                                                                  |     | 17,473    |                |
| Pseudo- $R^2 / \Delta R^2$ <sup>(a)</sup>    |                                                                  |     | .25 / .01 |                |

*Note.* Dependent variable is participation (coded as 1 = participated and 0 = refused). Mode = Dummy-coded with WBA as reference category.  $B$  = Regression weight for main effect of assessment mode or interaction effects for assessment mode with selection variables. Main effects for selection variables are not presented.  $R^2 / \Delta R^2$  = Explained variance / incremental variance explained by moderating effects.

<sup>(a)</sup> Across all imputed data sets the Nagelkerke  $R^2$  values were nearly identical. Thus, the mean  $R^2$  is given.

\*  $p < .05$



Table S3.

*Logit Regressions for Nonresponse Analyses for Students Participating in the Mode-Specific Assessments.*

| Variable                     | Reference category           | PBA         |               | CBA            |               | WBA           |               | WBA-switch     |               |               |
|------------------------------|------------------------------|-------------|---------------|----------------|---------------|---------------|---------------|----------------|---------------|---------------|
|                              |                              | <i>B</i>    | 95% CI        | <i>B</i>       | 95% CI        | <i>B</i>      | 95% CI        | <i>B</i>       | 95% CI        |               |
| Socio-demographics           | Gender                       | Male        |               |                |               |               |               |                |               |               |
|                              | female                       |             | 0.09          | (-0.19, 0.37)  | 0.12          | (-0.18, 0.42) | 0.22*         | (0.09, 0.35)   | 0.29*         | (0.14, 0.45)  |
|                              | Country of birth             | not Germany |               |                |               |               |               |                |               |               |
|                              | Germany                      |             | 0.04          | (-0.42, 0.50)  | -0.10         | (-0.78, 0.59) | 0.06          | (-0.23, 0.34)  | 0.02          | (-0.36, 0.41) |
|                              | Mother tongue                | non-German  |               |                |               |               |               |                |               |               |
|                              | German                       |             | 0.09          | (-0.36, 0.55)  | 0.21          | (-0.45, 0.87) | 0.07          | (-0.17, 0.31)  | 0.35          | (-0.01, 0.70) |
|                              | Children in household        | no          |               |                |               |               |               |                |               |               |
|                              | yes                          |             | -0.68*        | (-1.24, -0.12) | -0.53         | (-2.12, 1.06) | -0.46*        | (-0.75, -0.18) | -0.10         | (-0.52, 0.32) |
|                              | Household size               | one person  |               |                |               |               |               |                |               |               |
|                              | two persons                  |             | -0.72         | (-1.56, 0.11)  | -0.63         | (-1.98, 0.73) | -0.29         | (-0.81, 0.23)  | -0.03         | (-0.43, 0.33) |
|                              | three + persons              |             | -0.83         | (-1.67, 0.02)  | -0.59         | (-1.94, 0.76) | -0.52*        | (-1.01, -0.03) | -0.29         | (-0.63, 0.05) |
|                              | Year of birth                | before 1989 |               |                |               |               |               |                |               |               |
|                              | 1989/1990                    |             | -0.03         | (-0.22, 0.15)  | 0.15          | (-0.09, 0.39) | 0.11          | (-0.01, 0.24)  | 0.07          | (-0.08, 0.21) |
|                              | after 1990                   |             | 0.16          | (-0.06, 0.38)  | -0.13         | (-0.41, 0.14) | 0.05          | (-0.09, 0.19)  | 0.01          | (-0.15, 0.17) |
|                              | Years of education of mother |             | 0.02          | (-0.01, 0.05)  | 0.04          | (-0.01, 0.08) | -0.01         | (-0.03, 0.01)  | 0.01          | (-0.02, 0.04) |
| Years of education of father |                              | 0.03        | (-0.01, 0.06) | -0.04          | (-0.08, 0.01) | -0.01         | (-0.03, 0.02) | -0.02          | (-0.04, 0.01) |               |

Table S3. (continued)

| Variable                                  | Reference category               | PBA             |               | CBA            |                   | WBA            |                | WBA-switch     |                |                |
|-------------------------------------------|----------------------------------|-----------------|---------------|----------------|-------------------|----------------|----------------|----------------|----------------|----------------|
|                                           |                                  | <i>B</i>        | 95% CI        | <i>B</i>       | 95% CI            | <i>B</i>       | 95% CI         | <i>B</i>       | 95% CI         |                |
| Personality                               | Extraversion                     | -0.10           | (-0.24, 0.04) | -0.03          | (-0.18, 0.12)     | -0.14*         | (-0.21, -0.06) | -0.12*         | (-0.21, -0.03) |                |
|                                           | Agreeableness                    | 0.01            | (-0.14, 0.15) | 0.02           | (-0.17, 0.21)     | -0.02          | (-0.13, 0.09)  | -0.08          | (-0.20, 0.05)  |                |
|                                           | Conscientiousness                | 0.16*           | (0.03, 0.29)  | 0.01           | (-0.15, 0.17)     | -0.02          | (-0.10, 0.06)  | 0.05           | (-0.06, 0.16)  |                |
|                                           | Neuroticism                      | -0.02           | (-0.12, 0.09) | -0.04          | (-0.20, 0.12)     | -0.05          | (-0.12, 0.02)  | 0.00           | (-0.09, 0.08)  |                |
|                                           | Openness                         | -0.02           | (-0.12, 0.09) | -0.11          | (-0.24, 0.01)     | -0.09*         | (-0.16, -0.02) | -0.07          | (-0.15, 0.01)  |                |
|                                           | Self-esteem                      | 0.02*           | (-0.01, 0.05) | 0.01           | (-0.02, 0.04)     | 0.02*          | (0.00, 0.04)   | 0.00           | (-0.02, 0.01)  |                |
| Student characteristics                   | Region of Germany                | West            |               |                |                   |                |                |                |                |                |
|                                           | East                             |                 | 0.03          | (-0.15, 0.21)  | 0.00              | (-0.47, 0.47)  | 0.00           | (-0.12, 0.11)  | 0.36*          | (0.20, 0.52)   |
|                                           | Study of natural sciences        | no              |               |                |                   |                |                |                |                |                |
|                                           | yes                              |                 | -0.19*        | (-0.43, -0.05) | -0.06             | (-0.39, 0.27)  | 0.09           | (-0.04, 0.22)  | -0.39*         | (-0.55, -0.23) |
|                                           | Study of teacher education       | no              |               |                |                   |                |                |                |                |                |
|                                           | yes                              |                 | 0.41*         | (0.20, 0.63)   | 0.08              | (-0.17, 0.34)  | 0.16*          | (0.04, 0.29)   | -0.11          | (-0.26, 0.04)  |
|                                           | Public institution               | no              |               |                |                   |                |                |                |                |                |
|                                           | yes                              |                 | 0.82*         | (0.11, 1.53)   | -- <sup>(f)</sup> | --             | 0.19           | (-0.07, 0.46)  | -0.03          | (-0.52, 0.47)  |
|                                           | Institution type                 | general         |               |                |                   |                |                |                |                |                |
|                                           | Applied science                  |                 | -0.06         | (-0.33, 0.21)  | -0.96*            | (-1.33, -0.58) | -0.19*         | (-0.33, -0.05) | 0.27*          | (0.11, 0.43)   |
|                                           | other                            |                 | 0.22          | (-0.36, 0.80)  | 0.62              | (-1.92, 3.15)  | 0.07           | (-0.15, 0.29)  | 0.75*          | (0.30, 1.19)   |
|                                           | University admission certificate | non-traditional |               |                |                   |                |                |                |                |                |
|                                           | traditional                      |                 | 1.19*         | (0.44, 1.93)   | 0.10              | (-0.93, 1.13)  | 0.21           | (-0.07, 0.49)  | 0.50*          | (0.07, 0.93)   |
| non-German                                |                                  | 0.54            | (-0.46, 1.53) | -0.23          | (-1.72, 1.26)     | -0.33          | (-0.85, 0.19)  | -0.21          | (-1.00, 0.58)  |                |
| Average grade on 2 <sup>nd</sup> semester |                                  | -0.10           | (-0.28, 0.07) | -0.15          | (-0.40, 0.10)     | 0.01           | (-0.11, 0.13)  | 0.02           | (-0.10, 0.15)  |                |
| Mathematical competence                   |                                  | 0.01            | (-0.36, 0.38) | 0.04           | (-0.34, 0.43)     | 0.04           | (-0.06, 0.13)  | -0.02          | (-0.11, 0.07)  |                |
| Enjoy studying                            |                                  | 0.05            | (-0.05, 0.15) | -0.06          | (-0.20, 0.07)     | 0.03           | (-0.03, 0.09)  | -0.02          | (-0.09, 0.06)  |                |
| Probability of graduation                 |                                  | -0.03           | (-0.15, 0.10) | 0.11           | (-0.07, 0.28)     | 0.07           | (-0.01, 0.15)  | 0.13*          | (0.03, 0.22)   |                |

Table S3. (continued)

| Variable                                  |                        | Reference category | PBA      |              | CBA      |               | WBA      |              | WBA-switch |              |
|-------------------------------------------|------------------------|--------------------|----------|--------------|----------|---------------|----------|--------------|------------|--------------|
|                                           |                        |                    | <i>B</i> | 95% CI       | <i>B</i> | 95% CI        | <i>B</i> | 95% CI       | <i>B</i>   | 95% CI       |
| Participation in previous waves           | PBA W1 <sup>(a)</sup>  | no                 |          |              |          |               |          |              |            |              |
|                                           | yes                    |                    | 1.29*    | (0.74, 1.85) | 1.05*    | (0.33, 1.77)  | 0.55*    | (0.37, 0.74) | 0.26*      | (0.06, 0.46) |
|                                           | CAWI W2 <sup>(b)</sup> | no                 |          |              |          |               |          |              |            |              |
|                                           | yes                    |                    | 0.29*    | (0.11, 0.48) | 0.26*    | (-0.01, 0.53) | 0.71*    | (0.59, 0.82) | 0.62*      | (0.47, 0.77) |
|                                           | CATI W3 <sup>(c)</sup> | no                 |          |              |          |               |          |              |            |              |
|                                           | yes                    |                    | 0.72*    | (0.21, 1.22) | 0.69*    | (0.21, 1.18)  | 0.74*    | (0.26, 1.21) | 0.60*      | (0.23, 0.97) |
| CAWI W4 <sup>(d)</sup>                    | no                     |                    |          |              |          |               |          |              |            |              |
| yes                                       |                        |                    | 0.81*    | (0.63, 0.99) | 0.91*    | (0.64, 1.19)  | 1.39*    | (1.29, 1.50) | 1.05*      | (0.91, 1.19) |
| Previous mode                             | CBA                    |                    |          |              |          |               |          |              |            |              |
| PBA                                       |                        |                    | --       | --           | --       | --            | --       | --           | 0.18*      | (0.05,0.31)  |
| Sample Size                               |                        |                    | 5,371    |              | 3,431    |               | 8,671    |              | 6,804      |              |
| Pseudo- $R^2$ (Nagelkerke) <sup>(e)</sup> |                        |                    | 0.27     |              | 0.22     |               | 0.31     |              | 0.18       |              |

*Note.* Dependent variable is response (coded as 1 = response and 0 = nonresponse). (a) PBA W1: paper-based assessment in wave 1. (b) CAWI W2: web-based interview in Wave 2. (c) CATI W3: telephone interview in wave 3. (d) CAWI W4: web-based interview in wave 4. (e) Over all imputed data sets the pseudo  $R^2$  values are nearly identical. Thus, here the mean value of the pseudo  $R^2$  values derived using the single imputed data sets is reported. (f) For administrative reasons, CBA was not administered at private universities.

\*  $p < .05$

Table S4.

*Linear Regressions Evaluating Prediction Bias for Full Sample.*

| Criterion:                    | Grade point average |                | Academic self-concept |                | Study-related helplessness |                | Intention to quit |                |  |
|-------------------------------|---------------------|----------------|-----------------------|----------------|----------------------------|----------------|-------------------|----------------|--|
|                               | <i>B</i>            | 95% CI         | <i>B</i>              | 95% CI         | <i>B</i>                   | 95% CI         | <i>B</i>          | 95% CI         |  |
| Predictor                     |                     |                |                       |                |                            |                |                   |                |  |
| Intercept                     | 0.09                | (0.00, 0.30)   | -0.13*                | (-0.21, -0.06) | 0.10*                      | (0.01, 0.28)   | 0.05              | (-0.03, 0.13)  |  |
| <i>Main effect of science</i> |                     |                |                       |                |                            |                |                   |                |  |
| 1. Scientific literacy        | -0.08               | (-0.14, 0.01)  | 0.21*                 | (0.14, 0.27)   | 0.06*                      | (-0.34, -0.09) | -0.08*            | (-0.16, -0.01) |  |
| <i>Main effects of mode</i>   |                     |                |                       |                |                            |                |                   |                |  |
| 2. CBA                        | -0.12               | (-0.30, 0.06)  | 0.17*                 | (0.05, 0.29)   | -0.12                      | (-0.26, 0.02)  | 0.01              | (-0.13, 0.16)  |  |
| 3. WBA                        | -0.01               | (-0.11, 0.09)  | 0.12*                 | (0.03, 0.22)   | -0.07                      | (-0.16, 0.01)  | -0.01             | (-0.11, 0.08)  |  |
| 4. WBA-switch                 | -0.02               | (-0.12, 0.09)  | 0.11*                 | (0.01, 0.20)   | -0.07                      | (-0.16, 0.02)  | 0.06              | (-0.03, 0.15)  |  |
| <i>Moderating effects</i>     |                     |                |                       |                |                            |                |                   |                |  |
| 5. 1. x 2.                    | -0.01               | (-0.15, 0.14)  | -0.04                 | (-0.15, 0.07)  | -0.07                      | (-0.19, 0.06)  | -0.04             | (-0.17, 0.08)  |  |
| 6. 1. x 3.                    | 0.00                | (-0.08, 0.08)  | -0.10*                | (-0.18, -0.02) | -0.02                      | (-0.10, 0.06)  | -0.02             | (-0.10, 0.07)  |  |
| 7. 1. x 4.                    | 0.00                | (-0.08, 0.09)  | -0.09                 | (-0.18, 0.00)  | 0.01                       | (-0.10, 0.12)  | 0.01              | (-0.09, 0.11)  |  |
| <i>Covariates</i>             |                     |                |                       |                |                            |                |                   |                |  |
| 8. Sex                        | -0.33*              | (-0.40, -0.26) | 0.05                  | (-0.02, 0.11)  | -0.02                      | (-0.08, 0.05)  | -0.06             | (-0.13, 0.01)  |  |
| 9. Teacher education          | -0.09*              | (-0.17, -0.01) | 0.02                  | (-0.06, 0.09)  | 0.01                       | (-0.07, 0.08)  | 0.00              | (-0.07, 0.07)  |  |
| $R^2 / \Delta R^2$            | .03 / .00           |                | .02 / .00             |                | .01 / .00                  |                | .01 / .00         |                |  |

*Note.*  $N = 8,442$ . Linear regression of outcomes on science literacy, assessment mode (dummy-coded with PBA as reference), respective interactions, and covariates. Sex (-0.5 = male, 0.5 = female) and teacher education (0.5 = other study, -0.5 = teacher education) were effect-coded. Outcomes and scientific literacy were  $z$ -standardized.  $R^2 / \Delta R^2 = \text{Explained variance} / \text{incremental variance explained by moderating effects}$ . PBA = standardized and supervised paper-based assessment, CBA = standardized and supervised computer-based assessment, WBA = unstandardized and unsupervised web-based assessment with random assignment, WBA-switch = unstandardized and unsupervised web-based assessment with non-random assignment (for PBA / CBA nonresponders).

\*  $p < .05$
